# Supplementary material for: Graphene homogeneously anchored with Ni(OH)2 nanoparticles as advanced supercapacitor electrodes
Source: Royal Society of Chemistry journal article supplement (doi:10.1039/c3ce41361f), 2013-01-01
Supplement: c3ce41361f.pdf [file c3ce41361f.pdf]

## Supplementary information

### Graphene homogeneously anchored with Ni(OH)<sub>2</sub> nanoparticles as advanced supercapacitor electrodes

Huijun Yan<sup>a,b</sup>, Jianwei Bai<sup>c</sup>, Jun Wang<sup>a,d,\*</sup>, Xiuyu Zhang<sup>b</sup>, Bin Wang<sup>a</sup>, Qi Liu<sup>a</sup>, and Lianhe Liu<sup>d</sup>

<sup>a</sup> Key Laboratory of Superlight Material and Surface Technology, Ministry of Education, Harbin Engineering University, 150001, PR China.

<sup>b</sup> Department of Chemistry, Harbin University, 150086, PR China.

<sup>c</sup> Polymer Materials Research Center, Harbin Engineering University, 150001, PR China.

<sup>d</sup> Institute of Advanced Marine Materials, Harbin Engineering University, 150001, PR China.

\*Corresponding author: Tel.: +86 451 8253 3026; fax: +86 451 8253 3026. E-mail address: [zhqw1888@sohu.com](mailto:zhqw1888@sohu.com)

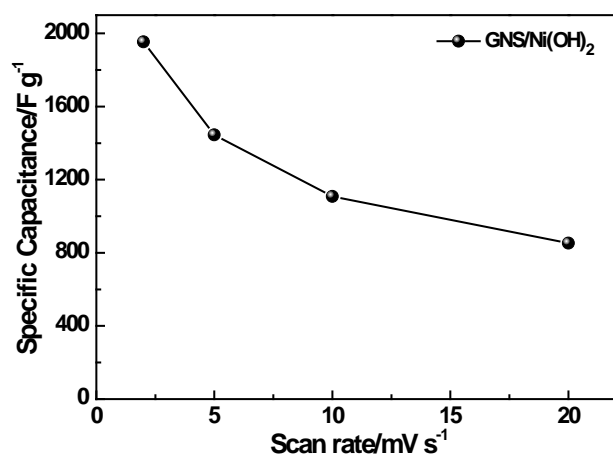

Figure S1 Specific capacitance of GNS/Ni(OH)<sub>2</sub> at different scan rates calculated from the cyclic voltammetry measurements at scan rates of 2, 5, 10 and 20 mV s<sup>-1</sup>.

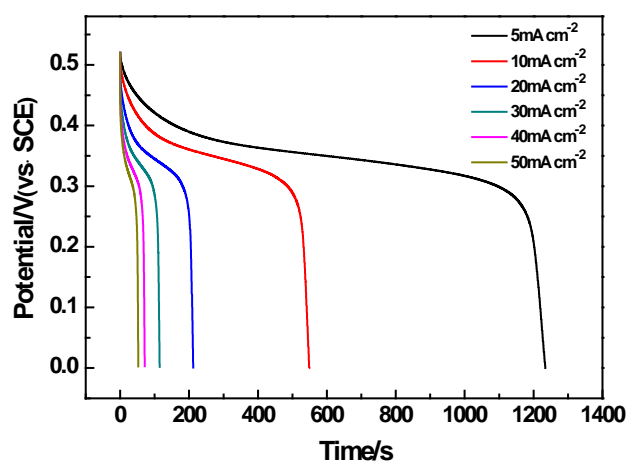

Figure S2 Discharge curves of GNS/Ni(OH)<sub>2</sub> electrode measured at different discharge current densities in 6.0 mol L<sup>-1</sup> KOH solution.
